# Supplementary material for: Oxide of lanthanoids can catalyse non-oxidative propane dehydrogenation: mechanistic concept and application potential of Eu2O3- or Gd2O3-based catalysts
Source: Royal Society of Chemistry journal article supplement (doi:10.1039/d0cc05496h), 2020-01-01
Supplement: d0cc05496h1.pdf [file d0cc05496h1.pdf]

## Supporting information

**Oxide of lanthanoids can catalyze non-oxidative propane dehydrogenation:  
mechanistic concept and application potential of  $\text{Eu}_2\text{O}_3$ - or  $\text{Gd}_2\text{O}_3$ -based catalysts**

Anna Perechodjuk, Vita A. Kondratenko, Henrik Lund, Nils Rockstroh, Evgenii V. Kondratenko\*

*Leibniz-Institut für Katalyse e.V., Albert-Einstein-Str. 29a, Rostock, 18059, Germany*

\*e-mail: [Evgenii.kondratenko@catalysis.de](mailto:Evgenii.kondratenko@catalysis.de)

## Table of contents

|     |                                         |    |
|-----|-----------------------------------------|----|
| 1   | Experimental section.....               | 3  |
| 1.1 | Catalyst preparation .....              | 3  |
| 1.2 | General catalyst characterization ..... | 3  |
| 1.3 | Temporal analysis of products .....     | 4  |
| 1.4 | Catalytic tests .....                   | 5  |
| 2   | Tables .....                            | 8  |
| 3   | Figures .....                           | 10 |
| 4   | Reference .....                         | 19 |

# 1 Experimental section

## 1.1 Catalyst preparation

Eu<sub>2</sub>O<sub>3</sub> and Gd<sub>2</sub>O<sub>3</sub> were synthesized according to Tyagi et. al.<sup>1</sup> Briefly, Europium(III) nitrate hydrate (Eu(NO<sub>3</sub>)<sub>3</sub>·6H<sub>2</sub>O) or Gadolinium(III) nitrate hydrate (Gd(NO<sub>3</sub>)<sub>3</sub>·6H<sub>2</sub>O) were used as oxidants and glycine (NH<sub>2</sub>CH<sub>2</sub>COOH) was used as fuel. Stoichiometric ratio of the oxidant to the fuel 1:1.0 was applied. In detail, to synthesize 1 g of product, Eu(NO<sub>3</sub>)<sub>3</sub>·6H<sub>2</sub>O (2.54 g, 5.7 mmol) and glycine (0.43 g, 5.7 mmol) or Gd(NO<sub>3</sub>)<sub>3</sub>·6H<sub>2</sub>O (3.09 g, 5.5 mmol) and glycine (0.41 g, 5.5 mmol), respectively, were dissolved in approximately 15 mL water in a 1 L beaker. The method is scalable up to 8 g, when using 3L beaker instead of 1L. The obtained solution was heated to 120 – 150 °C under stirring until yellow solid was formed. Auto-ignition occurs spontaneously after about 2 h tempering this solid above 250 °C. The chemical reaction for this preparation method using the stoichiometric ratio 1:1.0 of the oxidant to the fuel is given as follows.

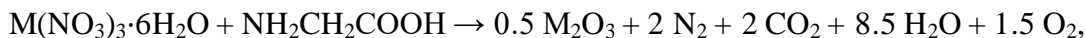

where M stands for Eu or Gd.

The white powder obtained after completing the combustion process was collected. It was either calcined at 550 °C for 3 h or directly used for preparation of supported materials. The latter were synthesized through an impregnation method with a colloidal solution of Rh nanoparticles (NPs). Metal loading was 0.001, 0.01 or 0.03 wt%. Detailed preparation method of metal NPs and catalysts synthesis are described in our previous study.<sup>2</sup>

## 1.2 General catalyst characterization

XRD powder patterns were recorded on a Panalytical X'Pert diffractometer equipped with a Xcelerator detector using automatic divergence slits and Cu Kα1/α2 radiation (40 kV, 40 mA; λ = 0.15406 nm, 0.154443 nm). The measurements were performed with a 0.0167° step and 25 s of

data collecting time per step. The crystallite size was calculated by applying the Scherrer equation using the integral breadth under the assumption of spherically shaped crystallites.

STEM micrographs were obtained on a probe aberration corrected JEM-ARM200F transmission electron microscope (Jeol Ltd.) at 200 kV. Sampling was done by dry deposition of the catalyst powder on a Cu grid (mesh 300) covered by a holey carbon film, which was then transferred into the microscope.

To investigate catalyst reducibility, temperature-programmed reduction ( $H_2$ -TPR) experiments were carried out in an in-house developed setup equipped with eight individually heated continuous-flow fixed-bed quartz reactors. Initially, each catalyst (100 mg) was heated in  $N_2$  flow up to 550 °C ( $10\text{ K}\cdot\text{min}^{-1}$ ) followed by feed air ( $10\text{ mL}\cdot\text{min}^{-1}$ ) for 1 h and then cooling down to 40 °C. After flushing with Ar ( $10\text{ mL}\cdot\text{min}^{-1}$ , 15 min) the calcined samples were heated in a flow of  $H_2$ :Ar = 5:95 ( $10\text{ mL}\cdot\text{min}^{-1}$ ) to 900 °C with a heating rate of  $10\text{ K}\cdot\text{min}^{-1}$ . The  $H_2$  consumption was quantified using the ratio of  $H_2$ /Ar being detected at the atomic mass units of 2 ( $H_2$ ) and 40 (Ar).

The surface area analysis was carried out by the standard BET technique with  $N_2$  physisorption at  $-196\text{ °C}$  using a Micromeritics ASAP 2020 setup.

### *1.3 Temporal analysis of products*

Transient studies with  $O_2$ ,  $D_2$ ,  $C_3H_8$  or  $C_3D_8$  were performed in the temporal analysis of products (TAP) reactor.<sup>3, 4</sup> For each catalyst ( $Gd_2O_3$  or Rh(0.001 wt%)/ $Gd_2O_3$ ), 55 mg of catalyst (particle size: 315 – 710  $\mu\text{m}$ ) were sandwiched between two layers of quartz (particle size: 250 – 350  $\mu\text{m}$ ) in the isothermal zone of an in-house developed micro-reactor made of quartz ( $d_{in} = 6\text{ mm}$ ,  $L = 40\text{ mm}$ ). Prior to the pulse experiments, each catalyst was pretreated as follows: it was initially heated ( $10\text{ K}\cdot\text{min}^{-1}$ ) in an  $O_2$  flow ( $5\text{ mL}\cdot\text{min}^{-1}$ ) from room temperature to 550 (for Rh(0.001 wt%)/ $Gd_2O_3$ ) or 600 °C (for  $Gd_2O_3$ ). Then, it was flushed at the same temperature in a

flow of N<sub>2</sub> (5 mL·min<sup>-1</sup>) for 5 min and finely treated in a flow of 60 vol% H<sub>2</sub> in N<sub>2</sub> (5 mL·min<sup>-1</sup>) for 1 h. After completing this treatment, the catalyst was exposed to high vacuum of 10<sup>-5</sup> Pa.

The number of oxygen vacancies was determined upon pulsing an O<sub>2</sub>:Ar = 1:1 mixture over Gd<sub>2</sub>O<sub>3</sub> or Rh(0.001 wt%)/Gd<sub>2</sub>O<sub>3</sub> at 550 °C. The mixture was prepared using O<sub>2</sub> (Air Liquide, 4.5) and Ar (Linde Gas, 5.0) without additional purification. It was pulsed until no changes were observed in the intensity of O<sub>2</sub> transient responses during at least 30 pulses.

To check catalyst ability for hydrogen activation, a D<sub>2</sub>:Ne = 1:1 mixture was pulsed over Gd<sub>2</sub>O<sub>3</sub> or Rh(0.001 wt%)/Gd<sub>2</sub>O<sub>3</sub> at 550 °C. D<sub>2</sub> (CK special gases limited, N2.8) and Ne (Air Liquide, 4.0) were used for preparing the mixture “as received”.

Mechanistic aspects of propane dehydrogenation over Gd<sub>2</sub>O<sub>3</sub> or Rh(0.001 wt%)/Gd<sub>2</sub>O<sub>3</sub> were derived from single pulse experiments at 550 °C with C<sub>3</sub>H<sub>8</sub>:Ar = 1:1 or C<sub>3</sub>D<sub>8</sub>:Ar = 1:1 mixtures prepared using C<sub>3</sub>H<sub>8</sub> (Linde, 3.5), C<sub>3</sub>D<sub>8</sub> (ISOTEC INC, 99 atom % D) and Ar (Air Liquide, 5.0).

A quadrupole mass spectrometer (HAL RC 301 Hiden Analytical) was applied for quantitative analysis of the feed components and the reaction products. The following AMUs (atomic mass units) were used for mass-spectrometric identification of different compounds: 52 (C<sub>3</sub>D<sub>8</sub>), 48 (C<sub>3</sub>D<sub>6</sub>), 46 (C<sub>3</sub>D<sub>6</sub>), 44 (C<sub>3</sub>H<sub>8</sub>), 42 (C<sub>3</sub>H<sub>8</sub>, C<sub>3</sub>H<sub>6</sub>), 41 (C<sub>3</sub>H<sub>8</sub>, C<sub>3</sub>H<sub>6</sub>), 32 (O<sub>2</sub>), 34 (C<sub>3</sub>D<sub>8</sub>), 29 (C<sub>3</sub>H<sub>8</sub>), 4 (D<sub>2</sub>), 3 (HD), 2 (H<sub>2</sub>), 20 (Ne) and 40 (Ar). The concentration of the feed components and the reaction products was determined from the respective AMUs using standard fragmentation patterns and sensitivity factors derived from analyzing mixtures of known composition.

#### 1.4 Catalytic tests

An in-house developed setup consisting of 15 continuous-flow fixed-bed quartz reactors operating at 1 bar in parallel was used for catalytic tests with a C<sub>3</sub>H<sub>8</sub>:N<sub>2</sub> = 2:3 feed. To determine the rate of propene formation, the degree of propane conversion was kept below 10% for

ensuring pseudo differential reactor operation. Catalyst amount (0.05 g, fraction 315 – 710  $\mu\text{m}$ ) and total reaction feed flow ( $40\text{ mL}\cdot\text{min}^{-1}$ ) were used. Firstly, the catalysts were heated in  $\text{N}_2$  flow up to  $550\text{ }^\circ\text{C}$  and calcined in air flow for 1 h. After flushing with  $\text{N}_2$  for 15 min they were pretreated in  $\text{H}_2$  flow ( $\text{H}_2:\text{N}_2 = 1:1$ ) for 1 h and flushed with  $\text{N}_2$  for 15 min again. Finally, the reaction feed was directed to a selected reactor, while other reactors were flushed with  $\text{N}_2$ . The latter procedure was repeated using different temperatures ( $T_{\text{red}} = 575, 600, 625, 650\text{ }^\circ\text{C}$ ) of reductive pretreated in  $\text{H}_2$  flow ( $\text{H}_2 : \text{N}_2 = 1:1$ ), while the temperature of  $550\text{ }^\circ\text{C}$  was set for calcination in air flow and for dehydrogenation reaction.

To construct selectivity-conversion relationship for propene and other side products including coke, catalytic tests were carried out at  $550\text{ }^\circ\text{C}$  at different contact times to reach different degrees of propane conversion. The total feed flow was varied between 6 and  $60\text{ mL}\cdot\text{min}^{-1}$ . The catalysts (0.4 g) were initially heated in  $\text{N}_2$  flow up to  $550\text{ }^\circ\text{C}$ , calcined in air flow for 1 h, heated in  $\text{N}_2$  flow up to  $600\text{ }^\circ\text{C}$  and then pretreated in a flow of  $\text{H}_2$  ( $\text{H}_2:\text{N}_2 = 1:1$ ) also for 1 h. After cooling down in  $\text{N}_2$  flow to  $550\text{ }^\circ\text{C}$  the selected reactor was treated with reaction feed, while other reactors were flushed with  $\text{N}_2$ .

The feed components and the reaction products were quantified by an on-line gas chromatograph (Agilent 6890) equipped with flame ionization (FID) and thermal conductivity detectors (TCD).

Equations (1) – (5) were used to calculate the space time yield of propene formation  $\text{STY}(\text{C}_3\text{H}_6)$  expressed as  $\text{kg}(\text{C}_3\text{H}_6)\cdot\text{h}^{-1}\cdot\text{m}^{-3}_{\text{cat}}$ , the rate of propene formation  $r(\text{C}_3\text{H}_6)$  expressed as  $\text{mmol}(\text{C}_3\text{H}_6)\cdot\text{g}^{-1}_{\text{cat}}\cdot\text{min}^{-1}$ , propane conversion  $X(\text{C}_3\text{H}_8)$ , selectivity to gas phase products ( $S_i$ ) and coke  $S(\text{coke})$ , respectively.

$$\text{STY}(\text{C}_3\text{H}_6) = \frac{\dot{n}_{\text{C}_3\text{H}_6}^{\text{out}} \cdot M(\text{C}_3\text{H}_6) \cdot 60}{m_{\text{cat}}} \quad (1)$$

$$r(\text{C}_3\text{H}_6) = \frac{\text{STY}(\text{C}_3\text{H}_6) \cdot 1000}{60 \cdot M(\text{C}_3\text{H}_6)} \quad (2)$$

$$X(\text{C}_3\text{H}_8) = \frac{\dot{n}_{\text{C}_3\text{H}_8}^{\text{in}} - \dot{n}_{\text{C}_3\text{H}_8}^{\text{out}}}{\dot{n}_{\text{C}_3\text{H}_8}^{\text{in}}} \quad (3)$$

$$S_i = \frac{v_i}{3} \cdot \frac{\dot{n}_i^{\text{out}}}{\dot{n}_{\text{C}_3\text{H}_8}^{\text{in}} - \dot{n}_{\text{C}_3\text{H}_8}^{\text{out}}} \quad (4)$$

$$S(\text{coke}) = 1 - \sum S_i \quad (5)$$

Where  $\dot{n}_{\text{C}_3\text{H}_6}^{\text{out}}$  is the molar flow rate of propene under standard conditions ( $\text{mol} \cdot \text{min}^{-1}$ ),  $M(\text{C}_3\text{H}_6)$  is the molar mass of propene ( $42.02 \text{ g} \cdot \text{mol}^{-1}$ ),  $m_{\text{cat}}$  is the catalyst amount (g),  $\rho_{\text{cat}}$  is the density of catalyst ( $\text{kg} \cdot \text{m}^{-3}$ ),  $\dot{n}^{\text{in}}$  and  $\dot{n}^{\text{out}}$  stand for the molar flows of gas phase components at the reactor inlet and outlet respectively ( $\text{mol} \cdot \text{min}^{-1}$ ),  $v_i$  is the number of carbon atoms in a product  $i$ .  $\text{N}_2$  was used as internal standard for taking into account reaction-induced changes in the number of moles.

## 2 Tables

**Table S1** Crystallite size, phase, surface area, pore volume and average pore diameter of Eu<sub>2</sub>O<sub>3</sub> and Gd<sub>2</sub>O<sub>3</sub> synthesized by different methods.

| Catalyst                                        | Crystallite size/ nm | phase | Surface area / m <sup>2</sup> ·g <sup>-1</sup> | pore volume/ cm <sup>3</sup> ·g <sup>-1</sup> | average pore diameter / nm |
|-------------------------------------------------|----------------------|-------|------------------------------------------------|-----------------------------------------------|----------------------------|
| Eu <sub>2</sub> O <sub>3</sub> <sup>a)</sup>    | 11                   | cubic | 55                                             | 0.44                                          | 26                         |
| Eu <sub>2</sub> O <sub>3</sub> -C <sup>b)</sup> | 10                   | cubic | 23                                             | 0.04                                          | 4                          |
| Gd <sub>2</sub> O <sub>3</sub> <sup>a)</sup>    | 14                   | cubic | 44                                             | 0.34                                          | 27                         |
| Gd <sub>2</sub> O <sub>3</sub> -C <sup>b)</sup> | 11                   | cubic | 10                                             | 0.02                                          | 5                          |

<sup>a)</sup>M<sub>2</sub>O<sub>3</sub> synthesized by glycine-method and calcined at 550 °C for 3 h. <sup>b)</sup>M<sub>2</sub>O<sub>3</sub> synthesized by calcination of corresponding nitrate at 550 °C for 3 h.

**Table S2** The space time yield of propene formation STY(C<sub>3</sub>H<sub>6</sub>) of various catalysts from literature and from the present study in the non-oxidative propane dehydrogenation to propene.

| Name of the catalyst                                                            | X (C <sub>3</sub> H <sub>8</sub> ) / – | T / °C | STY(C <sub>3</sub> H <sub>6</sub> ) /kg·h <sup>-1</sup> ·kg <sup>-1</sup> | Ref.      |
|---------------------------------------------------------------------------------|----------------------------------------|--------|---------------------------------------------------------------------------|-----------|
| Ga/Cr- $\alpha$ -ZrP                                                            | 0.28                                   | 550    | 0.41                                                                      | 5         |
| Cr <sub>2</sub> O <sub>3</sub> /ZrO <sub>2</sub>                                | 0.61                                   | 550    | 0.13                                                                      | 6         |
| Cr5/SBA-1                                                                       | 0.33                                   | 550    | 0.32                                                                      | 7         |
| Cr <sub>2</sub> O <sub>3</sub> -K <sub>2</sub> O/Al <sub>2</sub> O <sub>3</sub> | 0.42                                   | 550    | 0.55                                                                      | 2         |
| Cr <sub>2</sub> O <sub>3</sub> -K <sub>2</sub> O/Al <sub>2</sub> O <sub>3</sub> | 0.51                                   | 600    | 2.59                                                                      | 2         |
| Cr <sub>2</sub> O <sub>3</sub> -K <sub>2</sub> O/Al <sub>2</sub> O <sub>3</sub> | 0.42                                   | 625    | 3.18                                                                      | 2         |
| Ga <sub>2</sub> O <sub>3</sub>                                                  | 0.33                                   | 600    | 0.35                                                                      | 8         |
| Ga <sub>2</sub> O <sub>3</sub> /Al <sub>2</sub> O <sub>3</sub>                  | 0.33                                   | 600    | 0.09                                                                      | 9         |
| VO <sub>x</sub> /Al <sub>2</sub> O <sub>3</sub>                                 | 0.32                                   | 600    | 0.86                                                                      | 10        |
| VO <sub>x</sub> /Al <sub>2</sub> O <sub>3</sub>                                 | 0.25                                   | 600    | 1.39                                                                      | 11        |
| ZrO <sub>2</sub>                                                                | 0.28                                   | 550    | 1.58                                                                      | 12        |
| ZrO <sub>2</sub>                                                                | 0.28                                   | 600    | 2.71                                                                      | 12        |
| ZrO <sub>2</sub>                                                                | 0.28                                   | 625    | 3.15                                                                      | 12        |
| ZnO/ZSM-5                                                                       | 0.92                                   | 600    | 0.33                                                                      | 13        |
| ZnO/Al <sub>2</sub> O <sub>3</sub>                                              | 0.35                                   | 600    | 1.04                                                                      | 14        |
| ZnO@NC/S-1                                                                      | 0.55                                   | 600    | 0.40                                                                      | 15        |
| Eu <sub>2</sub> O <sub>3</sub>                                                  | 0.23                                   | 550    | 0.46                                                                      | This work |
| Gd <sub>2</sub> O <sub>3</sub>                                                  | 0.23                                   | 550    | 0.56                                                                      | This work |



**Table S3** Rh-loading in wt% determined by ICP, temperatures of maximal reduction ( $T_{\max}(\text{H}_2)$ ) and amounts of  $\text{H}_2$  consumed ( $n(\text{H}_2)$ ) in  $\text{H}_2$ -TPR experiments.

| Name of the catalyst                 | wt%                | $T_{\max}(\text{H}_2) / ^\circ\text{C}$ | $n(\text{H}_2) / \mu\text{mol}\cdot\text{g}^{-1}$ |
|--------------------------------------|--------------------|-----------------------------------------|---------------------------------------------------|
| $\text{Eu}_2\text{O}_3$              | –                  | 590                                     | 309.05                                            |
| 0.001 wt% Rh $\text{Eu}_2\text{O}_3$ | n.d. <sup>a)</sup> | 590                                     | 502.80                                            |
| 0.01 wt% Rh $\text{Eu}_2\text{O}_3$  | 0.01               | 450; 590                                | 952.54                                            |
| 0.03 wt% Rh $\text{Eu}_2\text{O}_3$  | 0.03               | 430; 570                                | 831.58                                            |
| $\text{Gd}_2\text{O}_3$              | –                  | 580                                     | 197.77                                            |
| 0.001 wt% Rh $\text{Gd}_2\text{O}_3$ | n.d.               | 590                                     | 386.95                                            |
| 0.01 wt% Rh $\text{Gd}_2\text{O}_3$  | 0.01               | 480; 595                                | 748.95                                            |
| 0.03 wt% Rh $\text{Gd}_2\text{O}_3$  | 0.02               | 470; 600                                | 838.19                                            |

<sup>a)</sup>n.d.= not definable

### 3 Figures

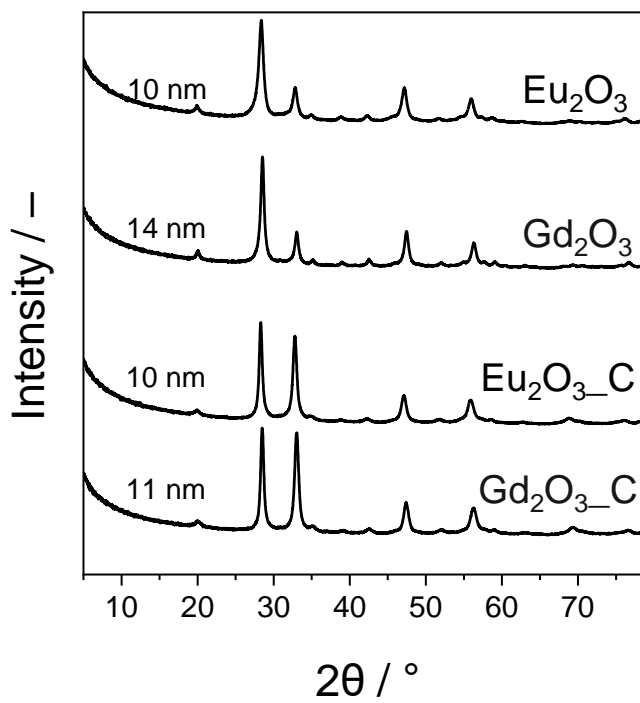

**Figure S 1** XRD pattern of  $\text{Eu}_2\text{O}_3$  or  $\text{Gd}_2\text{O}_3$  and through calcination preparation method synthesized  $\text{Eu}_2\text{O}_3\text{-C}$  and  $\text{Gd}_2\text{O}_3\text{-C}$ .

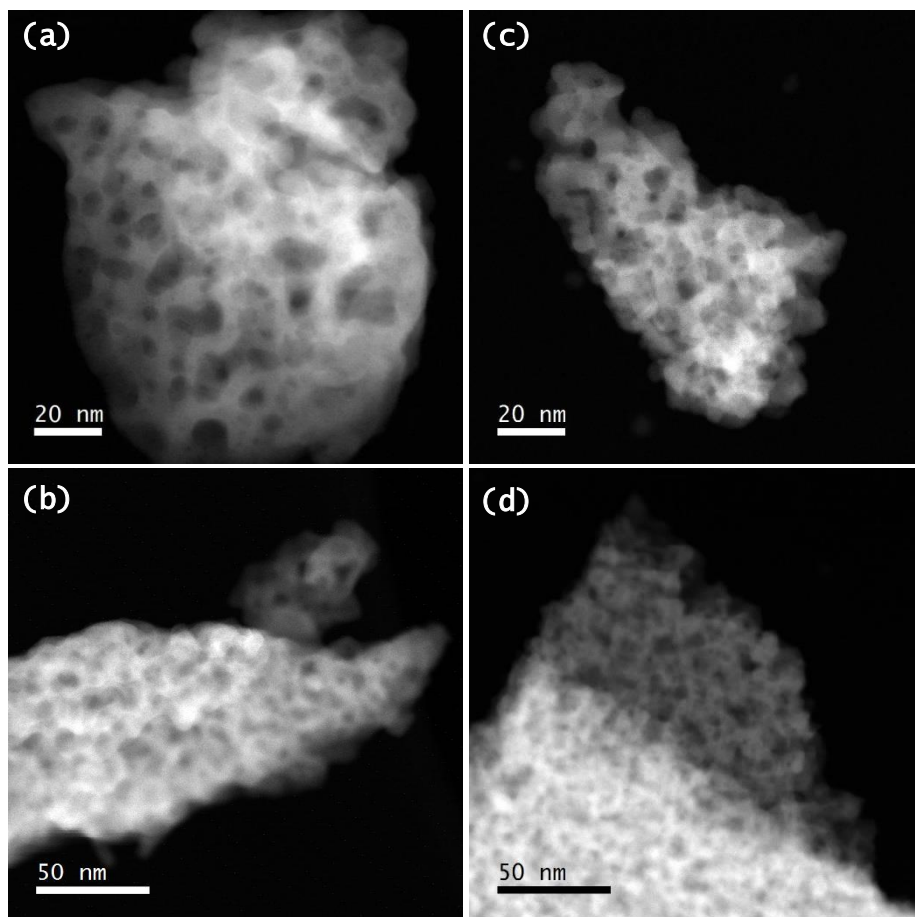

**Figure S 2** HAADF-STEM images of  $\text{Gd}_2\text{O}_3\_C$  (a, b) and  $\text{Eu}_2\text{O}_3\_C$  (c, d) prepared through calcination of the corresponding nitrates at  $550\text{ }^\circ\text{C}$  for 3 h.

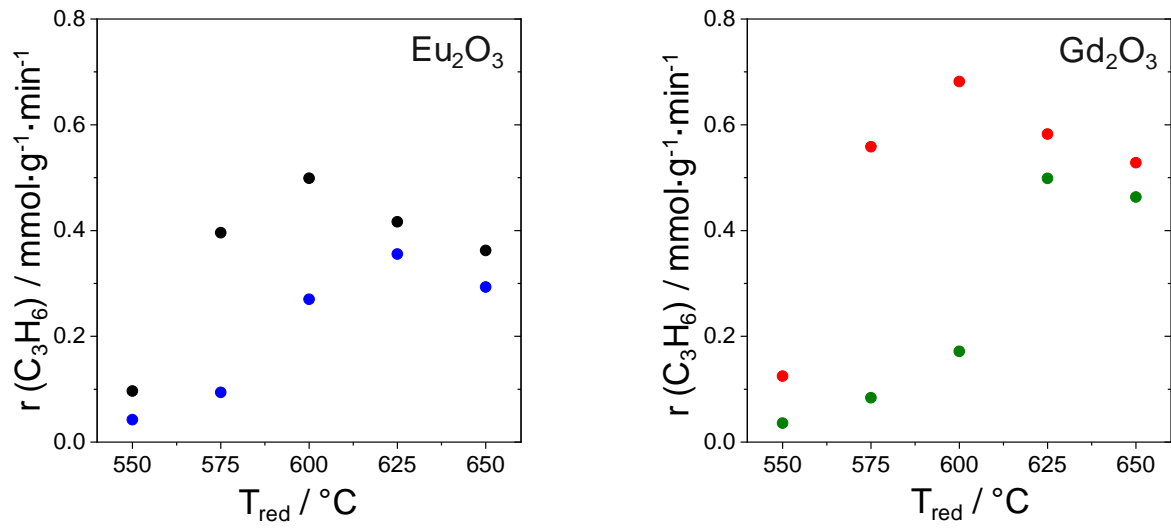

**Figure S 3** The rate of propene formation over Eu<sub>2</sub>O<sub>3</sub> (●), Gd<sub>2</sub>O<sub>3</sub> (●), Eu<sub>2</sub>O<sub>3</sub>\_C (●) and Gd<sub>2</sub>O<sub>3</sub>\_C (●) versus temperature of reductive catalyst pretreatment with H<sub>2</sub> (T<sub>red</sub>). Reaction condition: 550 °C, X(C<sub>3</sub>H<sub>8</sub>) < 0.1, C<sub>3</sub>H<sub>8</sub>:N<sub>2</sub> = 2:3 feed.

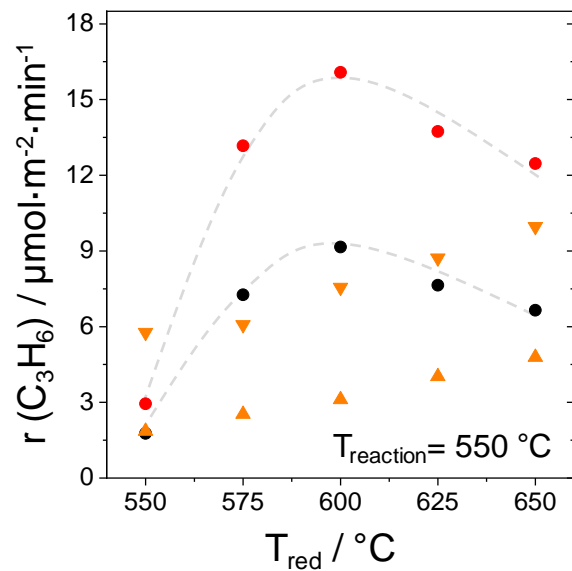

**Figure S 4** The rate of propene formation calculated using specific surface area instead of the mass of the catalyst over bare Eu<sub>2</sub>O<sub>3</sub> (●), Gd<sub>2</sub>O<sub>3</sub> (●) and LaZrO<sub>x</sub> (▲) or YZrO<sub>x</sub> (▼) from previous study<sup>2</sup> versus temperature of reductive pretreatment with H<sub>2</sub> ( $T_{\text{red}}$ ). Reaction condition: 550 °C,  $X(\text{C}_3\text{H}_8) < 0.1$ ,  $\text{C}_3\text{H}_8:\text{N}_2 = 2:3$  feed.

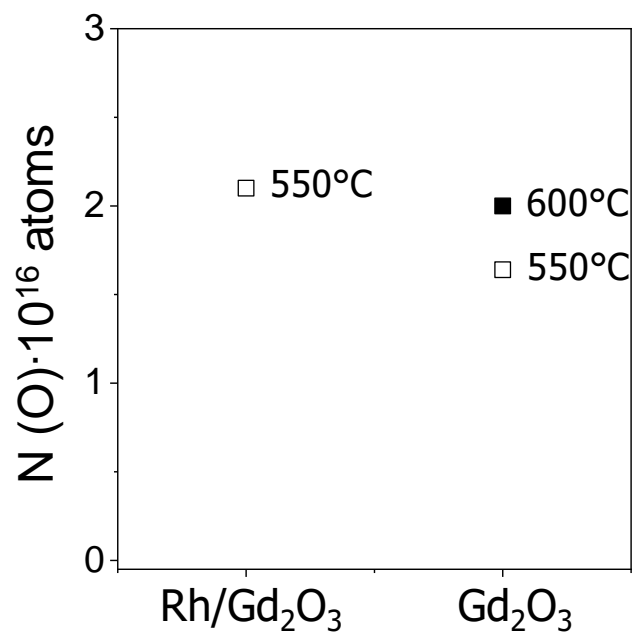

**Figure S 5** Amount of consumed oxygen atoms over bare Gd<sub>2</sub>O<sub>3</sub> after reductive pretreatment with H<sub>2</sub> at 550 °C or 600 °C and Gd<sub>2</sub>O<sub>3</sub> supported with 0.001 wt% Rh (T<sub>red</sub> = 550 °C).

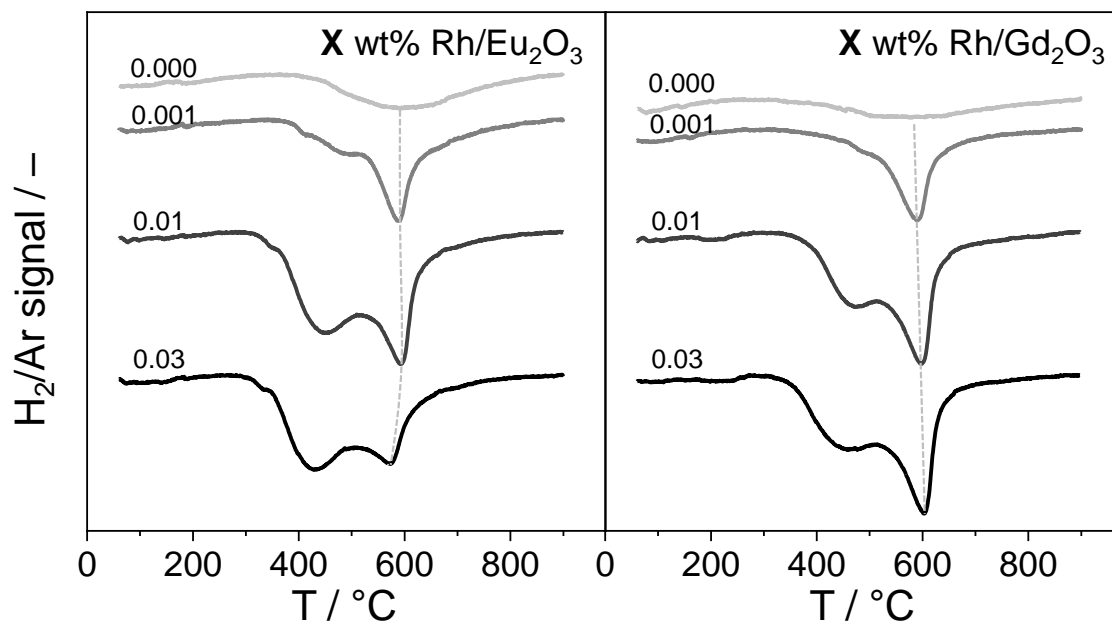

**Figure S 6** H<sub>2</sub>-TPR profiles of bare Eu<sub>2</sub>O<sub>3</sub> or of bare Gd<sub>2</sub>O<sub>3</sub>, as well as their counterparts with 0.001 wt%, 0.01 wt% or 0.03 wt% Rh.

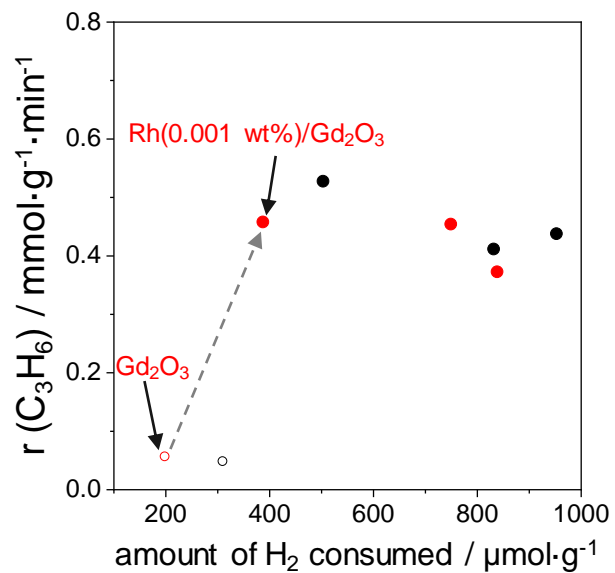

**Figure S 7** The rate of propene formation versus the amount of H<sub>2</sub> consumed in H<sub>2</sub>-TPR tests with bare Eu<sub>2</sub>O<sub>3</sub> (○) and its counterparts with 0.001, 0.01 or 0.03 wt% Rh (●). The corresponding Gd<sub>2</sub>O<sub>3</sub>-based catalysts are represented by the red symbols. The content of Rh increases from the left-hand side to the right-hand side.



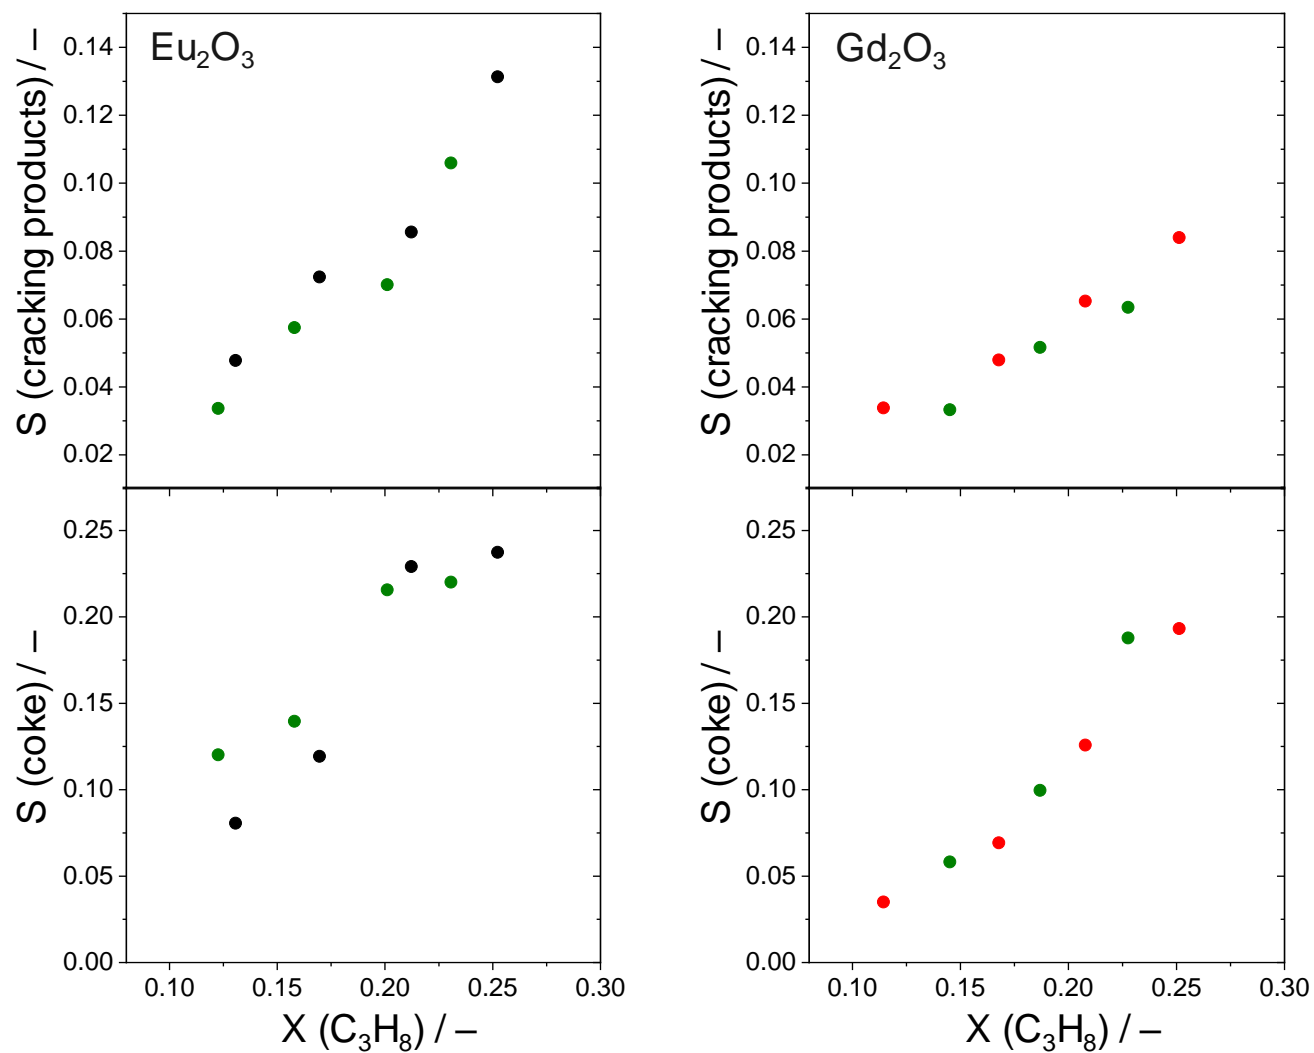

**Figure S 8** Selectivity to cracking products or selectivity to coke conversion versus propane conversion over bare  $\text{Eu}_2\text{O}_3$  (●) or  $\text{Gd}_2\text{O}_3$  (●) and its counterparts with 0.001 wt% (●) Rh at 550 °C ( $T_{\text{red}} = 600$  °C).

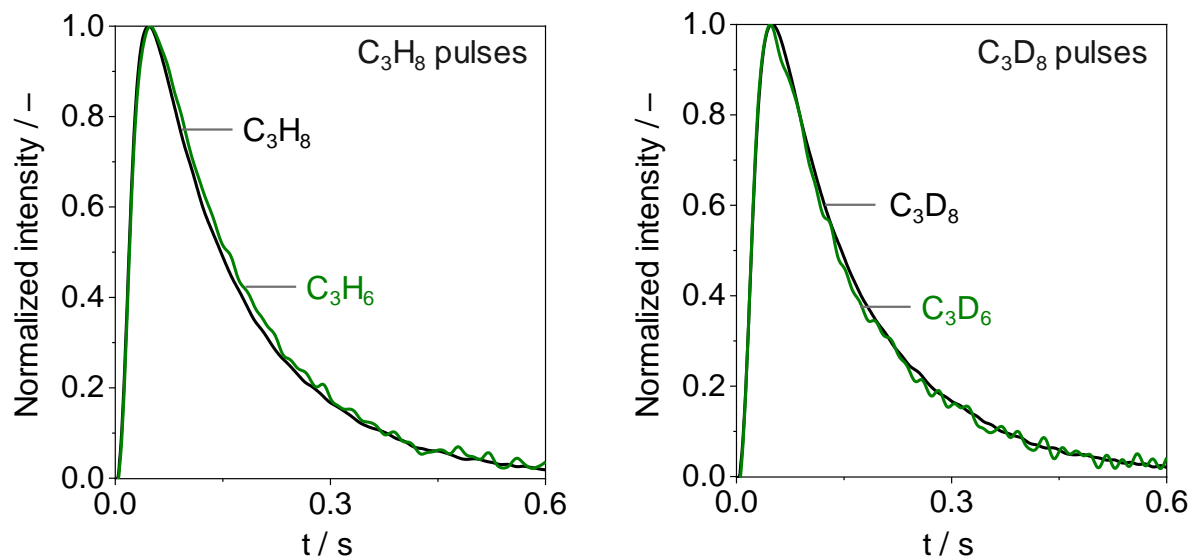

**Figure S 9** The height-normalized responses of C<sub>3</sub>H<sub>8</sub>:C<sub>3</sub>H<sub>6</sub> or C<sub>3</sub>D<sub>8</sub>:C<sub>3</sub>D<sub>6</sub> recorded after pulsing of C<sub>3</sub>H<sub>8</sub>:Ar = 1:1 or C<sub>3</sub>D<sub>8</sub>:Ar = 1:1 mixtures over Rh(0.001 wt%)/Gd<sub>2</sub>O<sub>3</sub> at 550 °C (T<sub>red</sub> = 550 °C).

## 4 Reference

1. R. Shukla and A. K. Tyagi, *Mater. Sci. Forum*, 2010, **653**, 131–152.
2. T. Otroshchenko, V. A. Kondratenko, U. Rodemerck, D. Linke and E. V. Kondratenko, *J. Catal.*, 2017, **348**, 282–290.
3. J. Pérez-Ramírez and E. V. Kondratenko, *Catal. Today*, 2007, **121**, 160–169.
4. K. Morgan, N. Maguire, R. Fushimi, J. T. Gleaves, A. Goguet, M. P. Harold, E. V. Kondratenko, U. Menon, Y. Schuurman and G. S. Yablonsky, *Catal. Sci. Technol.*, 2017, **7**, 2416–2439.
5. M. Alcántara-Rodríguez, E. Rodríguez-Castellón and A. Jiménez-López, *Langmuir*, 1999, **15**, 1115–1120.
6. X. Zhang, Y. Yue and Z. Gao, *Catal. Lett.*, 2002, **83**, 19–25.
7. P. Michorczyk, P. Pietrzyk and J. Ogonowski, *Micro. Mesopor. Mater.*, 2012, **161**, 56–66.
8. P. Michorczyk and J. Ogonowski, *Appl. Catal., A*, 2003, **251**, 425–433.
9. B. Xu, B. Zheng, W. Hua, Y. Yue and Z. Gao, *J. Catal.*, 2006, **239**, 470–477.
10. G. Liu, Z.-J. Zhao, T. Wu, L. Zeng and J. Gong, *ACS Catal.*, 2016, **6**, 5207–5214.
11. Z.-J. Zhao, T. Wu, C. Xiong, G. Sun, R. Mu, L. Zeng and J. Gong, *Angew. Chem. Int. Ed.*, 2018, **57**, 6791–6795.
12. Y. Zhang, Y. Zhao, T. Otroshchenko, H. Lund, M.-M. Pohl, U. Rodemerck, D. Linke, H. Jiao, G. Jiang and E. V. Kondratenko, *Nat. Commun.*, 2018, **9**, 3794.
13. C. Chen, Z.-P. Hu, J.-T. Ren, S. Zhang, Z. Wang and Z.-Y. Yuan, *Mol. Catal.*, 2019, **476**, 110508.
14. G. Liu, L. Zeng, Z.-J. Zhao, H. Tian, T. Wu and J. Gong, *ACS Catal.*, 2016, **6**, 2158–2162.
15. D. Zhao, Y. Li, S. Han, Y. Zhang, G. Jiang, Y. Wang, K. Guo, Z. Zhao, C. Xu, R. Li, C. Yu, J. Zhang, B. Ge and E. V. Kondratenko, *iScience*, 2019, **13**, 269–276.
